# Supplementary material
Source: publisher figshare collection journal article supplement (https://acs.figshare.com/ndownloader/files/3785899)

## Synthesis and use of stable isotope labelled internal standards for quantification of phosphorylated metabolites by LC-MS/MS

Stéphanie Arrivault,<sup>\*,†</sup> Manuela Guenther,<sup>†</sup> Stephen C. Fry,<sup>‡</sup> Maximilian M.F.F. Fuenfgeld,<sup>†</sup> Daniel Veyel,<sup>†</sup> Tabea Mettler-Altmann,<sup>†,§</sup> Mark Stitt,<sup>†</sup> and John E. Lunn<sup>†</sup>

<sup>†</sup>Max Planck Institute of Molecular Plant Physiology, Am Muehlenberg 1, 14476 Potsdam-Golm, Germany

<sup>‡</sup>The Edinburgh Cell Wall Group, Institute of Molecular Plant Sciences, School of Biological Sciences, The University of Edinburgh, Edinburgh, EH9 3BF U.K.

<sup>§</sup>Present address: Cluster of Excellence on Plant Sciences (CEPLAS) and Institute of Plant Biochemistry, Heinrich-Heine-Universität Düsseldorf, Universitätsstraße 1, 40225 Düsseldorf, Germany

\* To whom correspondence should be addressed: Stéphanie Arrivault, Max Planck Institute of Molecular Plant Physiology, Am Muehlenberg 1, 14476 Potsdam-Golm, Germany; telephone +493315678114; [arrivault@mpimp-golm.mpg.de](mailto:arrivault@mpimp-golm.mpg.de)

### Supplementary Material and Methods

S-2

- Growth of plants and cell cultures
- Optimization of sampling of photosynthetic tissues from plants
- Sample collection

### Supplementary Tables

S-6

- Table S1: Specific compound-dependent MS parameters for selected reaction monitoring (SRM) and SIL-IS amounts added to extracts.
- Table S2: Amounts of substrates and products in the reaction mixture pre- and post-HVPE purification.
- Table S3: Percentage of cross-signal contributions between analytes and corresponding SIL-IS.
- Table S4: Analyte amounts quantified with or without SIL-IS in various biological materials.

### Supplementary Figures

S-9

- Figure S1: Hexose phosphates, ATP, ADP and AMP separation by HVPE at pH 2.0 and 3.5.
- Figure S2: Electrophoretogram for the purification of [2,3,4,5-<sup>13</sup>C<sub>4</sub>]R5P.
- Figure S3: Quantification of analytes with (filled circles) or without (open circles) SIL-IS in various biological materials.

## Supplementary Material and Methods

### Growth of plants and cell cultures

*Arabidopsis thaliana* [L.] Heynh., accession Col-0 was grown for 5 weeks under 8/16 h day/night cycles at an average irradiance of  $120 \mu\text{mol photons m}^{-2} \text{s}^{-1}$ , temperatures of 22/20 °C and relative humidities of 60/75 %, or for 3 weeks under 16/8 h day/night cycles at an average irradiance of  $140 \mu\text{mol photons m}^{-2} \text{s}^{-1}$ , temperature of 20 °C and relative humidity of 75 %. Plants were grown in soil in individual 6-cm diameter pots, with water/gas permeable plastic membrane (Aquafol, Meyer, Germany) covering the soil surface. Maize (*Zea mays* L. cv. B73) seeds were germinated in the dark at 28 °C for 3 days in sealed petri dishes containing moistened filter paper. Seedlings were transferred to soil in 10-cm diameter pots and grown for 5 days under 16/8 h day/night cycles at an average irradiance of  $105 \mu\text{mol photons m}^{-2} \text{s}^{-1}$ , temperatures of 22/18 °C and relative humidity of 70 %. Subsequently, maize plants were grown under 14/10 h day/night cycles at an average irradiance of  $480 \mu\text{mol photons m}^{-2} \text{s}^{-1}$ , temperatures of 25/22 °C and relative humidities of 30/65 %. Wheat (*Triticum aestivum* cv. Anza) was grown in soil in 10-cm diameter pots under 16/8 h day/night cycles at an average irradiance of  $105 \mu\text{mol photons m}^{-2} \text{s}^{-1}$ , temperatures of 22/18 °C and relative humidity of 70 %. Tobacco (*Nicotiana tabacum*) was grown in soil in 13-cm diameter pots under 16/8 h day/night cycles at an average irradiance of  $175 \mu\text{mol photons m}^{-2} \text{s}^{-1}$ , temperatures of 25/20 °C and relative humidity of 55 %. Tomato (*Solanum lycopersicum*) cv. M82 and potato (*Solanum tuberosum* cv. Désirée) plants were grown as described in <sup>1</sup> and <sup>2</sup>, respectively.

*Chlamydomonas reinhardtii* CC1690 cells were grown in a medium containing 5 mM HEPES, 17.5 mM acetate, 1 mM K-phosphates, Beijerinck salts (7 mM  $\text{NH}_4\text{Cl}$ , 0.34 mM  $\text{CaCl}_2$ , and 0.41 mM  $\text{MgSO}_4$ ), and trace salt solution [ $184 \mu\text{M H}_3\text{BO}_3$ ,  $77 \mu\text{M ZnSO}_4$ ,  $26 \mu\text{M MnCl}_2$ ,  $18 \mu\text{M FeSO}_4$ ,  $7 \mu\text{M CoCl}_2$ ,  $6 \mu\text{M CuSO}_4$ , and  $1 \mu\text{M (NH}_4)_6\text{Mo}_7\text{O}_{24}$ ] in a 5-litre bioreactor flushed with 5 %  $\text{CO}_2$ , with a constant irradiance of  $41 \mu\text{mol photons m}^{-2} \text{s}^{-1}$  and temperature of 24°C. Cultures were maintained at a constant cell density ( $4.3 \times 10^6$  cells/mL) for five days as described in <sup>3</sup> before harvest.

Yeast (*Saccharomyces cerevisiae* pYX212) cells from a single colony grown on yeast extract- peptone-dextrose medium were used to inoculate 2 mL of minimal medium [-Ura] with 2 % (w/v) glucose, and incubated overnight at 28 °C with constant shaking at 200 rpm. The overnight culture was used to inoculate (1:500 dilution) 10 mL of the minimal medium in a 50 mL Erlenmeyer flask and incubated as before for 14.5 h before harvesting at an  $\text{OD}_{600}$  of around 0.5. Cell concentrations and corresponding cell volumes during growth of yeast cells were determined from four independent cultures with a Z2™ Coulter Counter® (Beckman Coulter Inc., CA, USA) in a size range from  $3.083 \mu\text{m}$  to  $12.3 \mu\text{m}$ , using a 100-fold dilution of the cultures, and averaging two counts. The resulting cell number  $\text{mL}^{-1}$  was proportional to the measured  $\text{OD}_{600}$  up to 0.7 ( $R^2 = 0.994$ ). A standard curve obtained by linear regression of  $\text{OD}_{600}$  vs. cell number  $\text{mL}^{-1}$  allowed calculation of the cell number per mL culture at a given  $\text{OD}_{600}$ .

*E.coli* K-12 MG1655 cells grown on a Luria-Bertani medium (LB) agar plate were used to inoculate a pre-culture in MOPS minimal medium (TEKNOVA Inc., CA, USA) containing 0.2 % (w/v) glucose and grown overnight at 37 °C with 200 rpm constant shaking. This culture was used to inoculate a main culture at a 1:30 dilution in 30 mL of pre-warmed minimal medium in

a 100 mL Erlenmeyer flask and incubated as described above for 4 h before harvesting at an OD<sub>600</sub> of around 0.5. Colony forming units (cfu) for *E. coli* MG 1655 was determined during growth of the bacteria. Aliquots of two to three independent cultures grown as described above were diluted 1:1×10<sup>5</sup> or 1:5×10<sup>5</sup> and 20 µL were plated on LB agar plates. After incubation of the plates at 37 °C overnight the cfu mL<sup>-1</sup> of cell culture were calculated as the number of bacterial colonies per plate × volume plated (mL) × dilution factor. The cfu mL<sup>-1</sup> culture were proportional to the measured OD<sub>600</sub> up to 0.7 ( $R^2 = 0.992$ ). A standard curve obtained by linear regression of OD<sub>600</sub> vs. cfu mL<sup>-1</sup> allowed calculation of the number of cells per mL culture at a given OD<sub>600</sub>.

### **Optimization of sampling of photosynthetic tissues from plants**

To be physiologically meaningful, metabolite measurements from any organism must not only be accurate, but also reliably reflect the *in vivo* concentrations in the living tissue or cells. Photosynthetic tissues present particular problems in this regard, because many photosynthetic intermediates combine high fluxes with small pool sizes, resulting in turnover times in the order of a second or less <sup>4, 5</sup>, and so are potentially very sensitive to any change in light conditions during the harvesting procedure, before metabolism is quenched. Freeze-clamping of leaf tissue between two metal blocks pre-cooled in liquid nitrogen is an effective way of almost instantaneously quenching metabolism <sup>6, 7</sup>, but is difficult to use with plants like *Arabidopsis* that have small leaves that grow as a rosette close to the soil. Pouring liquid nitrogen directly onto the plants was an alternative harvesting strategy employed by <sup>5</sup>, but required the plants to be grown with a permeable plastic membrane over the soil to prevent the leaves being frozen to the soil, which might not always be desirable. This procedure is also potentially hazardous, and impractical for use within growth chambers because of the exposure of surrounding plants to cold nitrogen vapour and the likelihood of damage to the chamber from the inevitable spillage of liquid nitrogen. Therefore, we tested an alternative technique, which involves cutting the hypocotyl from underneath the rosette and then rapidly plunging the cut rosette into liquid nitrogen, taking care not to shade it from above at any time, thus keeping the leaves illuminated under the ambient light conditions throughout the harvesting procedure.

To assess whether this harvesting technique was reliable, we compared metabolite levels in plants harvested by careful transfer into liquid nitrogen after excision (“Transfer”) with plants quenched directly by pouring liquid nitrogen on to them (“Quench”). A third set of plants (“Shaded”) was taken from under the lights for approx. 2 s before cutting the rosettes and plunging them into liquid nitrogen, to mimic the effects of shading during harvest. Metabolites were measured by LC-MS/MS <sup>5</sup>, with the extracts being spiked with the SIL-ISs described above to ensure accurate measurements. There were no significant differences between the “Quench” and “Transfer” samples in the levels of any of the measured metabolites (Figure S3). In contrast, R5P, Ru5P+Xu5P, DHAP and FBP were significantly ( $P<0.001$ ) lower in the “Shaded” samples, consistent with the very short turnover times estimated for these metabolites: 0.08, 0.33, 0.24 and 0.79 s, respectively <sup>5</sup>. AMP and glycerate were both significantly ( $P<0.001$ ) higher in the “Shaded” samples than those harvested in the light (Figure S3), likely reflecting a rapid drop in the adenylate charge as photophosphorylation stalls, and restriction of glycerate kinase activity by low ATP levels. These results demonstrate the critical importance of the harvesting

technique when sampling illuminated leaf material. Direct quenching with liquid nitrogen might still be necessary for harvesting plants during very short pulse-labelling experiments to measure photosynthetic fluxes<sup>8, 9</sup>, but our results show that the “Transfer” technique is just as effective as the less practical and more hazardous “Quench” technique for routine metabolite measurements in *Arabidopsis* rosettes.

**Figure S3: Effect of harvest procedures on *Arabidopsis* metabolite content.** *Arabidopsis* plants were harvested by pouring liquid nitrogen directly on the rosette leaves in the light field (“Quenching”), by cutting and transferring the rosette leaves into liquid nitrogen under the light field (“Transfer”) or away from the light field (“Shading”). Values are means  $\pm$  SD ( $n = 6$ , except for G1P where  $n = 5$ ). Significant differences from values obtained in quenched material according to Student’s *t* test are indicated by asterisks (\* $P < 0.05$ , \*\* $P < 0.01$  and \*\*\* $P < 0.001$ ).

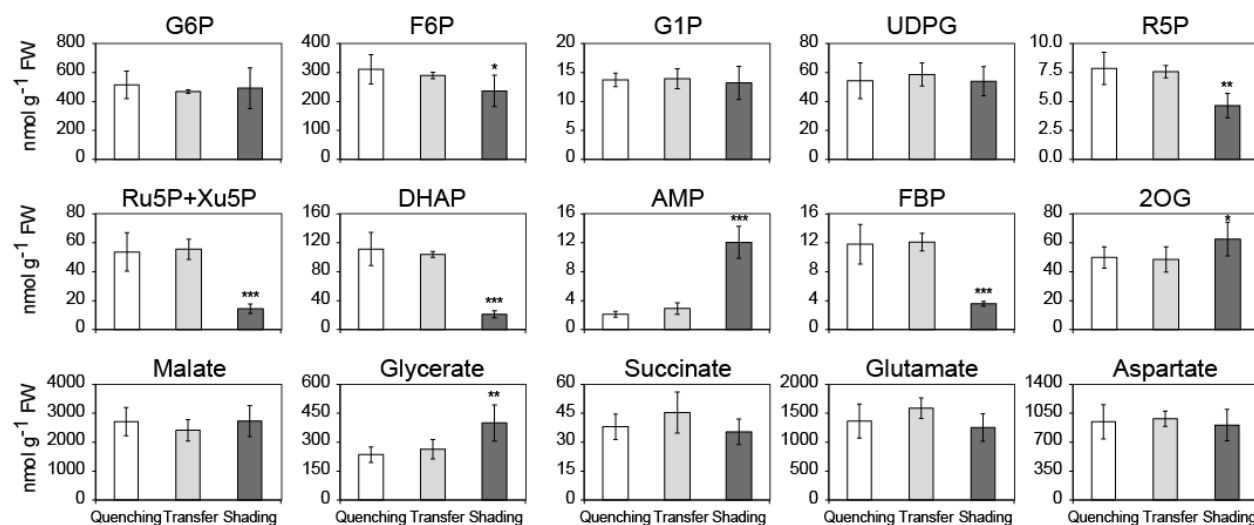

### Sample collection

Five-week-old and 3-week-old *Arabidopsis* plants were harvested by pouring a large volume of liquid nitrogen over the rosette leaves in such a way as to avoid shading the rosette. All frozen plant material above the plastic foil was collected and stored at  $-80^{\circ}\text{C}$ . Alternatively, rosette leaves from 3-week-old *Arabidopsis* plants were cut and transferred into liquid nitrogen while being kept constantly under the same irradiance without shading. In addition, 3-week-old *Arabidopsis* plants were removed from the light source, the rosette leaves cut and transferred into liquid nitrogen. Fully expended leaves 5 and 6 of 4-week-old maize plants, leaf 4 from the base of 5-week-old tobacco plants and all leaves of 3-week-old wheat plants were harvested by cutting and transferring them into liquid nitrogen while being kept constantly under the growth irradiance without shading. Pericarp from green and red tomato fruits was harvested at 35 DAP (days after pollination) and 55 DAP, respectively, according to<sup>10</sup>. Potato tubers from 8-week-old plants were harvested as described in<sup>2</sup>. *Chlamydomonas reinhardtii* cells were harvested as described in<sup>3</sup>. Yeast and *E. coli* cultures were grown until an  $\text{OD}_{600}$  of approximately 0.5. Two replicates of two mL from three individual cultures of yeast and six replicates of an *E. coli*

culture were harvested by vacuum filtration (PVDF membrane, 25 mm, 0.45 µm pore size, Sigma-Aldrich) at 28°C and 37°C, respectively, as described in <sup>11</sup>. Filters were immediately transferred into Eppendorfs tubes and frozen in liquid nitrogen. The liver from a female mouse (NMRI, six-month-old, obtained from JANVIER) was removed about 40 min after its death and immediately frozen in liquid nitrogen. All harvested materials were stored at -80°C until analysis. Frozen tissue was ground to a fine powder using either a Retsch ball-mill at liquid nitrogen temperature or a cryogenic grinding robot <sup>12</sup>.

## References (Supplementary Material and Methods)

1. Steinhauser, M. C.; Steinhauser, D.; Koehl, K.; Carrari, F.; Gibon, Y.; Fernie, A. R., Stitt, M., *Plant Physiol.* **2010**, 153, 80-98.
2. Araujo, W. L.; Nunes-Nesi, A.; Trenkamp, S.; Bunik, V. I., Fernie, A. R., *Plant Physiol.* **2008**, 148, 1782-1796.
3. Mettler, T.; Muhlhaus, T.; Hemme, D.; Schottler, M. A.; Rupprecht, J.; Idoine, A.; Veyel, D.; Pal, S. K.; Yaneva-Roder, L.; Winck, F. V.; Sommer, F.; Vosloh, D.; Seiwert, B.; Erban, A.; Burgos, A.; Arvidsson, S.; Schonfelder, S.; Arnold, A.; Gunther, M.; Krause, U.; Lohse, M.; Kopka, J.; Nikoloski, Z.; Mueller-Roeber, B.; Willmitzer, L.; Bock, R.; Schroda, M., Stitt, M., *Plant Cell* **2014**, 26, 2310-2350.
4. (a) Stitt, M.; Wirtz, W., Heldt, H. W., *Plant Physiol.* **1983**, 72, 767-774; (b) Stitt, M.; Wirtz, W., Heldt, H. W., *Biochim. Biophys. Acta* **1980**, 593, 85-102.
5. Arrivault, S.; Guenther, M.; Ivakov, A.; Feil, R.; Vosloh, D.; van Dongen, J. T.; Sulpice, R., Stitt, M., *Plant J.* **2009**, 59, 824-839.
6. Badger, M. R.; Sharkey, T. D., von Caemmerer, S., *Planta* **1984**, 160, 305-313.
7. Quick, W. P.; Schurr, U.; Scheibe, R.; Schulze, E.-D.; Rodermel, S. R.; Bogorad, L., Stitt, M., *Planta* **1991**, 183, 542-554.
8. Szecowka, M.; Heise, R.; Tohge, T.; Nunes-Nesi, A.; Vosloh, D.; Huege, J.; Feil, R.; Lunn, J.; Nikoloski, Z.; Stitt, M.; Fernie, A. R., Arrivault, S., *Plant Cell* **2013**, 25, 694-714.
9. Heise, R.; Arrivault, S.; Szecowka, M.; Tohge, T.; Nunes-Nesi, A.; Stitt, M.; Nikoloski, Z., Fernie, A. R., *Nat. Protoc.* **2014**, 9, 1803-1824.
10. Carrari, F.; Baxter, C.; Usadel, B.; Urbanczyk-Wochniak, E.; Zanol, M. I.; Nunes-Nesi, A.; Nikiforova, V.; Centro, D.; Ratzka, A.; Pauly, M.; Sweetlove, L. J., Fernie, A. R., *Plant Physiol.* **2006**, 142, 1380-1396.
11. Krall, L.; Huege, J.; Catchpole, G.; Steinhauser, D., Willmitzer, L., *J. Chromatogr. B Analyt. Technol. Biomed. Life Sci.* **2009**, 877, 2952-2960.
12. Stitt, M.; Sulpice, R.; Gibon, Y.; Whitwell, A.; Skilbeck, R.; Parker, S., Ellison, R., **2007**, German Patent No. 08146.0025U1. MPG/SFX Link Resolver.
13. Patiny, L.; Borel, A., *J. Chem. Inf. Model.* **2013**, 53, 1223-1228.

## Supplementary Tables

**Table S1: Specific compound-dependent MS parameters for selected reaction monitoring (SRM) and SIL-IS amounts added to extracts.** Abbreviations: G6P, glucose 6-phosphate; F6P, fructose 6-phosphate; G1P, glucose 1-phosphate; UDPG, UDP glucose; R5P, ribose 5-phosphate; Ru5P, ribulose 5-phosphate; Xu5P, xylulose 5-phosphate; DHAP, dihydroxy-acetone-phosphate; AMP, adenosine monophosphate; FBP, fructose 1,6-bisphosphate; 2-OG, 2-oxoglutarate.

| Compounds                                                            | Parent ion ([M-H] <sup>-</sup> )                                                                                                      | Mass  | Collision energy | Preferred product ion                                                                                   |       | SIL-IS added (μM) |
|----------------------------------------------------------------------|---------------------------------------------------------------------------------------------------------------------------------------|-------|------------------|---------------------------------------------------------------------------------------------------------|-------|-------------------|
|                                                                      | formula                                                                                                                               |       |                  | Formula                                                                                                 | Mass  |                   |
| [6,6- <sup>2</sup> H <sub>2</sub> ]G6P                               | C <sub>6</sub> H <sub>10</sub> <sup>2</sup> H <sub>2</sub> O <sub>9</sub> P <sup>-</sup>                                              | 261   | 22               | [H <sub>2</sub> PO <sub>4</sub> ] <sup>-</sup>                                                          | 97    | 1                 |
| [1,6- <sup>13</sup> C <sub>2</sub> ]F6P                              | <sup>12</sup> C <sub>2</sub> C <sub>4</sub> H <sub>12</sub> O <sub>9</sub> P <sup>-</sup>                                             | 261   | 22               | [H <sub>2</sub> PO <sub>4</sub> ] <sup>-</sup>                                                          | 97    | 0.5               |
| [U- <sup>13</sup> C]G1P                                              | <sup>13</sup> C <sub>6</sub> H <sub>12</sub> O <sub>9</sub> P <sup>-</sup>                                                            | 265   | 31               | [PO <sub>3</sub> ] <sup>-</sup>                                                                         | 79    | 0.5               |
| [ <sup>13</sup> C <sub>11</sub> , <sup>15</sup> N <sub>2</sub> ]UDPG | C <sub>4</sub> <sup>13</sup> C <sub>11</sub> H <sub>23</sub> <sup>15</sup> N <sub>2</sub> O <sub>17</sub> P <sub>2</sub> <sup>-</sup> | 576   | 28               | <sup>13</sup> C <sub>9</sub> H <sub>12</sub> <sup>15</sup> N <sub>2</sub> O <sub>9</sub> P <sup>-</sup> | 334.1 | 0.5               |
| [2,3,4,5- <sup>13</sup> C <sub>4</sub> ]R5P                          | C <sub>5</sub> H <sub>8</sub> <sup>2</sup> H <sub>2</sub> O <sub>8</sub> P <sup>-</sup>                                               | 233   | 10               | [H <sub>2</sub> PO <sub>4</sub> ] <sup>-</sup>                                                          | 97    | 0.2               |
| [2,3,4,5- <sup>13</sup> C <sub>4</sub> ]Ru5P/Xu5P                    | C <sub>5</sub> H <sub>8</sub> <sup>2</sup> H <sub>2</sub> O <sub>8</sub> P <sup>-</sup>                                               | 233   | 10               | [H <sub>2</sub> PO <sub>4</sub> ] <sup>-</sup>                                                          | 98    | 0.4               |
| [U- <sup>13</sup> C]DHAP                                             | <sup>13</sup> C <sub>3</sub> H <sub>6</sub> O <sub>6</sub> P <sup>-</sup>                                                             | 172   | 10               | [H <sub>2</sub> PO <sub>4</sub> ] <sup>-</sup>                                                          | 97    | 0.5               |
| [ <sup>13</sup> C <sub>10</sub> , <sup>15</sup> N <sub>5</sub> ]AMP  | <sup>13</sup> C <sub>10</sub> H <sub>13</sub> <sup>15</sup> N <sub>5</sub> O <sub>7</sub> P <sup>-</sup>                              | 361.1 | 21               | [PO <sub>3</sub> ] <sup>-</sup>                                                                         | 79    | 0.5               |
| [U- <sup>13</sup> C]FBP                                              | <sup>13</sup> C <sub>6</sub> H <sub>13</sub> O <sub>12</sub> P <sub>2</sub> <sup>-</sup>                                              | 345   | 27               | [H <sub>2</sub> PO <sub>4</sub> ] <sup>-</sup>                                                          | 97    | 2                 |
| [1,2,3,4- <sup>13</sup> C <sub>4</sub> ]2-OG                         | C <sub>4</sub> <sup>13</sup> CH <sub>5</sub> O <sub>5</sub> <sup>-</sup>                                                              | 149   | 12               | -CO <sub>2</sub>                                                                                        | 105   | 0.75              |
| [2,3,3- <sup>2</sup> H <sub>3</sub> ]malate                          | C <sub>4</sub> H <sub>2</sub> <sup>2</sup> H <sub>3</sub> O <sub>5</sub> <sup>-</sup>                                                 | 136   | 13               | -H <sup>2</sup> HO                                                                                      | 117   | 10                |
| [2,3,3- <sup>2</sup> H <sub>3</sub> ]glycerate                       | C <sub>3</sub> H <sub>2</sub> <sup>2</sup> H <sub>3</sub> O <sub>4</sub> <sup>-</sup>                                                 | 108   | 11               | C <sub>2</sub> H <sub>2</sub> <sup>2</sup> H <sub>1</sub> O <sub>3</sub> <sup>-</sup>                   | 76    | 1                 |
| [U- <sup>13</sup> C]succinate                                        | <sup>13</sup> C <sub>4</sub> H <sub>5</sub> O <sub>4</sub> <sup>-</sup>                                                               | 121   | 10               | - <sup>13</sup> CO <sub>2</sub>                                                                         | 76    | 1                 |
| [2,3,3- <sup>2</sup> H <sub>3</sub> ]glutamate                       | C <sub>5</sub> H <sub>5</sub> <sup>2</sup> H <sub>3</sub> NO <sub>4</sub> <sup>-</sup>                                                | 149   | 14               | -H <sup>2</sup> HO                                                                                      | 130   | 8                 |
| [2,3,3- <sup>2</sup> H <sub>3</sub> ]aspartate                       | C <sub>4</sub> H <sub>3</sub> <sup>2</sup> H <sub>3</sub> NO <sub>4</sub> <sup>-</sup>                                                | 135   | 13               | -CO <sub>2</sub>                                                                                        | 91    | 6                 |

**Table S2: Amounts of substrates and products in the reaction mixture pre- and post-HVPE purification.** Compounds present in each reaction mixture are presented and if possible were quantified. n.d. stands for not determined.

| Reaction mixtures<br>for                                             | Compounds                                                            | Amounts (nmol)       |                       | Synthesis<br>efficiency<br>(%) | Amounts<br>recovered<br>post-<br>purification<br>(%) |
|----------------------------------------------------------------------|----------------------------------------------------------------------|----------------------|-----------------------|--------------------------------|------------------------------------------------------|
|                                                                      |                                                                      | pre-<br>purification | post-<br>purification |                                |                                                      |
| [6,6- <sup>2</sup> H <sub>2</sub> ]G6P                               | [6,6- <sup>2</sup> H <sub>2</sub> ]G6P                               | 9467                 | 8244                  | 95                             | 87                                                   |
|                                                                      | ATP                                                                  | n.d.                 | n.d.                  |                                |                                                      |
|                                                                      | ADP                                                                  | 2756                 | -                     |                                |                                                      |
|                                                                      | AMP                                                                  | n.d.                 | n.d.                  |                                |                                                      |
|                                                                      | glucose                                                              | 630                  | -                     |                                |                                                      |
| [1,6- <sup>13</sup> C <sub>2</sub> ]F6P                              | [1,6- <sup>13</sup> C <sub>2</sub> ]F6P                              | 8447                 | 8129                  | 84                             | 96                                                   |
|                                                                      | ATP                                                                  | n.d.                 | n.d.                  |                                |                                                      |
|                                                                      | ADP                                                                  | n.d.                 | n.d.                  |                                |                                                      |
|                                                                      | AMP                                                                  | n.d.                 | n.d.                  |                                |                                                      |
|                                                                      | fructose                                                             | 461                  | -                     |                                |                                                      |
| [U- <sup>13</sup> C]G1P                                              | [U- <sup>13</sup> C]G1P                                              | 9837                 | 9350                  | 98                             | 95                                                   |
|                                                                      | sucrose                                                              | 97                   | -                     |                                |                                                      |
|                                                                      | fructose                                                             | 9950                 | -                     |                                |                                                      |
|                                                                      | Pi                                                                   | 50μmol               | n.d.                  |                                |                                                      |
|                                                                      |                                                                      |                      |                       |                                |                                                      |
| [ <sup>13</sup> C <sub>11</sub> , <sup>15</sup> N <sub>2</sub> ]UDPG | [ <sup>13</sup> C <sub>11</sub> , <sup>15</sup> N <sub>2</sub> ]UDPG | 9290                 | 8026                  | 77                             | 86                                                   |
|                                                                      | G1P                                                                  | 1100                 | -                     |                                |                                                      |
|                                                                      | UTP                                                                  | n.d.                 | nd                    |                                |                                                      |
|                                                                      | UDP                                                                  | n.d.                 | nd                    |                                |                                                      |
|                                                                      | UMP                                                                  | n.d.                 | nd                    |                                |                                                      |
| [2,3,4,5- <sup>13</sup> C <sub>4</sub> ]R5P                          | [2,3,4,5- <sup>13</sup> C <sub>4</sub> ]R5P                          | 7867                 | 1882                  | 79                             | 24                                                   |
|                                                                      | [2,3,4,5- <sup>13</sup> C <sub>4</sub> ]Ru5P/Xu5P                    | 2800                 | 369                   |                                |                                                      |
|                                                                      | ATP                                                                  | n.d.                 | n.d.                  |                                |                                                      |
|                                                                      | ADP                                                                  | 13                   | -                     |                                |                                                      |
|                                                                      | AMP                                                                  | 6700                 | -                     |                                |                                                      |
|                                                                      | Pi                                                                   | n.d.                 | n.d.                  |                                |                                                      |
| [2,3,4,5- <sup>13</sup> C <sub>4</sub> ]Ru5P/Xu5P                    | [2,3,4,5- <sup>13</sup> C <sub>4</sub> ]Ru5P/Xu5P                    | 9200                 | 4826                  | 92                             | 53                                                   |
|                                                                      | [2,3,4,5- <sup>13</sup> C <sub>4</sub> ]R5P                          | 2300                 | 320                   |                                |                                                      |
|                                                                      | ATP                                                                  | n.d.                 | n.d.                  |                                |                                                      |
|                                                                      | ADP                                                                  | 9                    | -                     |                                |                                                      |
|                                                                      | AMP                                                                  | 6600                 | -                     |                                |                                                      |
|                                                                      | Pi                                                                   | n.d.                 | n.d.                  |                                |                                                      |
| [U- <sup>13</sup> C]DHAP                                             | [U- <sup>13</sup> C]DHAP                                             | 3807                 | 1400                  | 38                             | 37                                                   |
|                                                                      | [U- <sup>13</sup> C]FBP                                              | 7300                 | -                     |                                |                                                      |
| [ <sup>13</sup> C <sub>10</sub> , <sup>15</sup> N <sub>5</sub> ]AMP  | [ <sup>13</sup> C <sub>10</sub> , <sup>15</sup> N <sub>5</sub> ]AMP  | 7984                 | 5408                  | 67                             | 68                                                   |
|                                                                      | ATP                                                                  | n.d.                 | -                     |                                |                                                      |
|                                                                      | ADP                                                                  | 5                    | -                     |                                |                                                      |

**Table S3: Percentage of cross-signal contributions between analytes and corresponding SIL-IS.**

| Compounds | Contribution (%) of |                   |
|-----------|---------------------|-------------------|
|           | Analyte to SIL-IS   | SIL-IS to analyte |
| G6P       | 1.41                | 0.12              |
| F6P       | 1.41                | 0.12              |
| G1P       | 0                   | 0.17              |
| UDPG      | 0                   | 0                 |
| R5P       | 0                   | 0                 |
| Ru5P      | 0                   | 0                 |
| Xu5P      | 0                   | 0                 |
| DHAP      | 0                   | 0                 |
| AMP       | 0                   | 0                 |
| FBP       | 0.40                | 2.99              |
| 2-OG      | 0                   | 0                 |

**Table S4: Analyte amounts quantified with or without SIL-IS in various biological materials.**

Measurements were performed at dilutions 0.01, 0.02, 0.05, 0.1 and 1 (undiluted) for extracts from leaves of Arabidopsis, maize, tobacco and wheat. Extracts from tomato green and red fruits, potato tuber were in addition measured at dilution 0.2. Extracts from mouse liver, *Chlamydomonas reinhardtii*, yeast and *E. coli* at dilutions 0.02, 0.05, 0.1, 0.2, 0.5, 1 and 2 (concentrated 2 times). Amounts are expressed as nmol g<sup>-1</sup> FW with the exception of *Chlamydomonas reinhardtii*, yeast and *E. coli* where amounts are expressed as pmol 10<sup>-6</sup> cells. *E. coli* amounts marked with <sup>a</sup> are in fmol 10<sup>-6</sup> cells. Values are means ± SD (*n* = 3, except for undiluted potato tuber extracts where *n* = 2). n.d. stands for not determined, \* indicates that the peak was not detected or too small to quantify and \*\* indicates multiple or poorly resolved peak.



**Supplementary Figures**

**Figure S1: Hexose phosphates, ATP, ADP and AMP separation by HVPE at pH 2.0 and 3.5.** Each compound was loaded at 50  $\mu$ g per spot. Electrophoresis was conducted at 4.5 kV for 20 min (pH 2.0) or 30 min (pH 3.5), and the spots were stained with molybdate reagent. Faintly stained spots are indicated with grey dotted circles. The origin is indicated by a gray line. The colored marker Orange G (orange dots) was loaded between each compound.

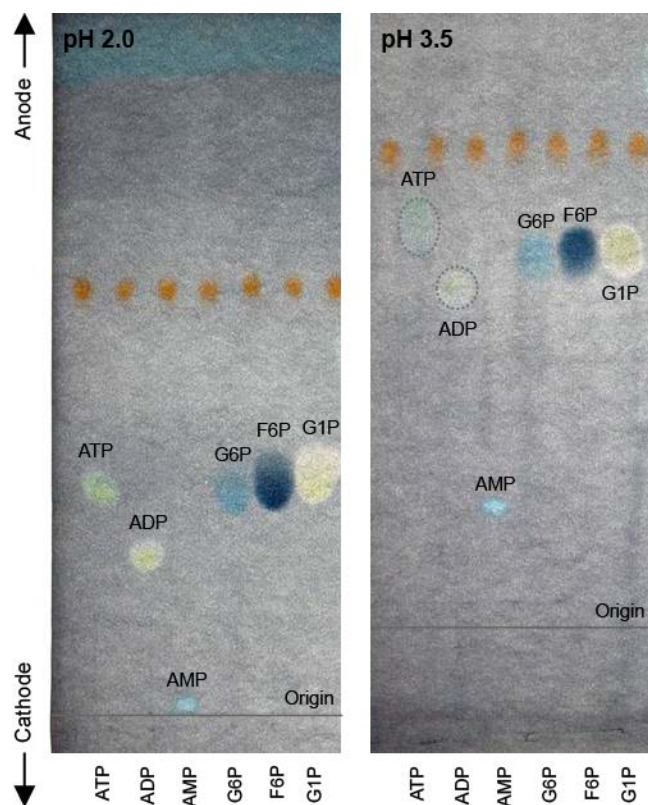

**Figure S2: Electrophoretogram for the purification of  $[2,3,4,5-^{13}\text{C}_4]\text{R5P}$ .** Markers run on the left side are Xu5P (1), ATP, ADP and AMP (2), Ru5P (3), Pi (4) and R5P (5). This part of the electrophoretogram was stained with molybdate reagent. Faintly stained spots are indicated with grey dotted circles. The main bands localized under 254-nm UV and originally marked with pencil are marked in grey. The origin is indicated by a gray line. The electrophoretogram was run at pH 3.5, 4.5 kV for 30 min. The colored marker Orange G (orange dots) was loaded between each compound.

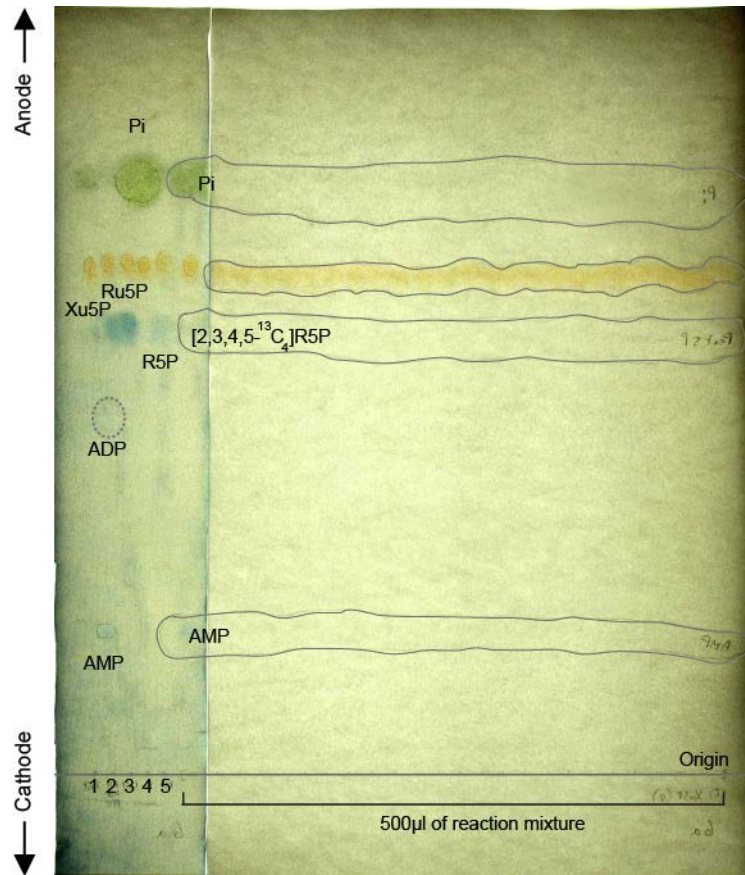

**Figure S3: Quantification of analytes with (filled circles) or without (open circles) SIL-IS in various biological materials.** F6P (A), G1P (B), UDPG (C), R5P (D), Ru5P+Xu5P (E), DHAP (F), AMP (G), FBP (H), 2-OG (I), malate (J), glycerate (K), succinate (L), glutamate (M) and aspartate (N). Measurements were performed in extracts from leaves of *Arabidopsis*, maize, tobacco and wheat diluted 100-, 50-, 20-, and 10-fold (indicated on the x-axis as 0.01, 0.02, 0.05 and 0.1, respectively) and undiluted (1). Green and red tomato fruits and potato tuber extracts were additionally diluted 5-fold (0.2). Extracts from mouse liver, *C. reinhardtii*, yeast and *E. coli* were measured after 50-, 20-, 10-, 5-, and 2-fold dilutions (indicated on the x-axis as 0.02, 0.05, 0.1, 0.2, and 0.5, respectively), undiluted (1) and in 2-fold (2) concentrated extracts. Values are means  $\pm$  SD ( $n = 3$ , except for undiluted potato tuber extracts, where  $n = 2$ ). Data are presented in Table S4 Supplementary Information. Significant differences from values obtained with signal corrected by SIL-IS according to Student's *t* test are indicated by asterisks (\* $P < 0.05$ , \*\* $P < 0.01$ , and \*\*\* $P < 0.001$ ).

## A-F6P

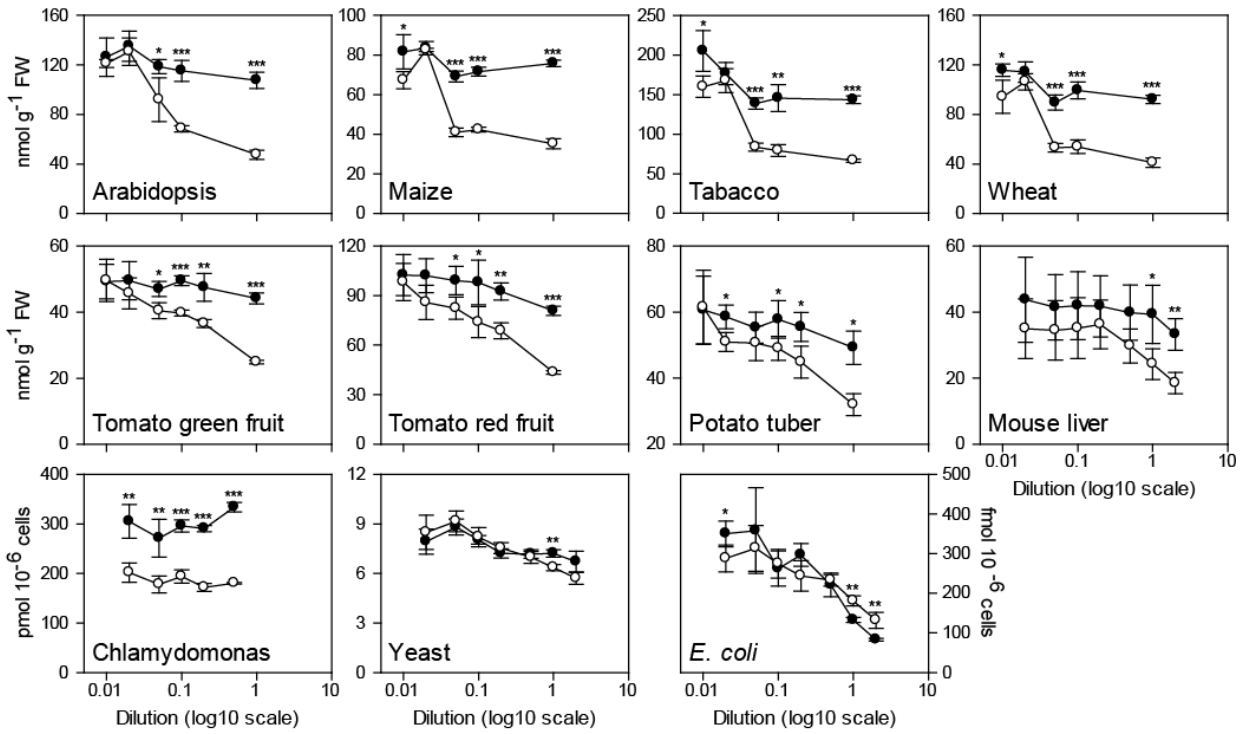

## B-G1P

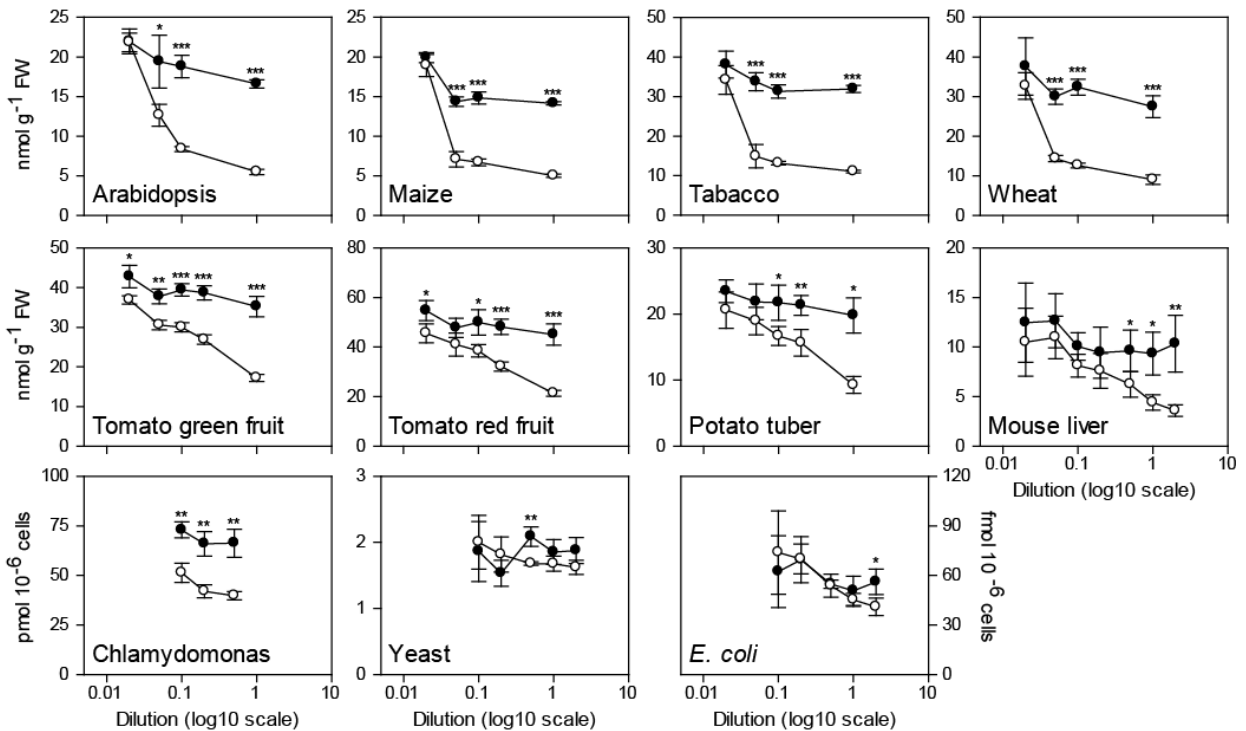

**C-UDPG**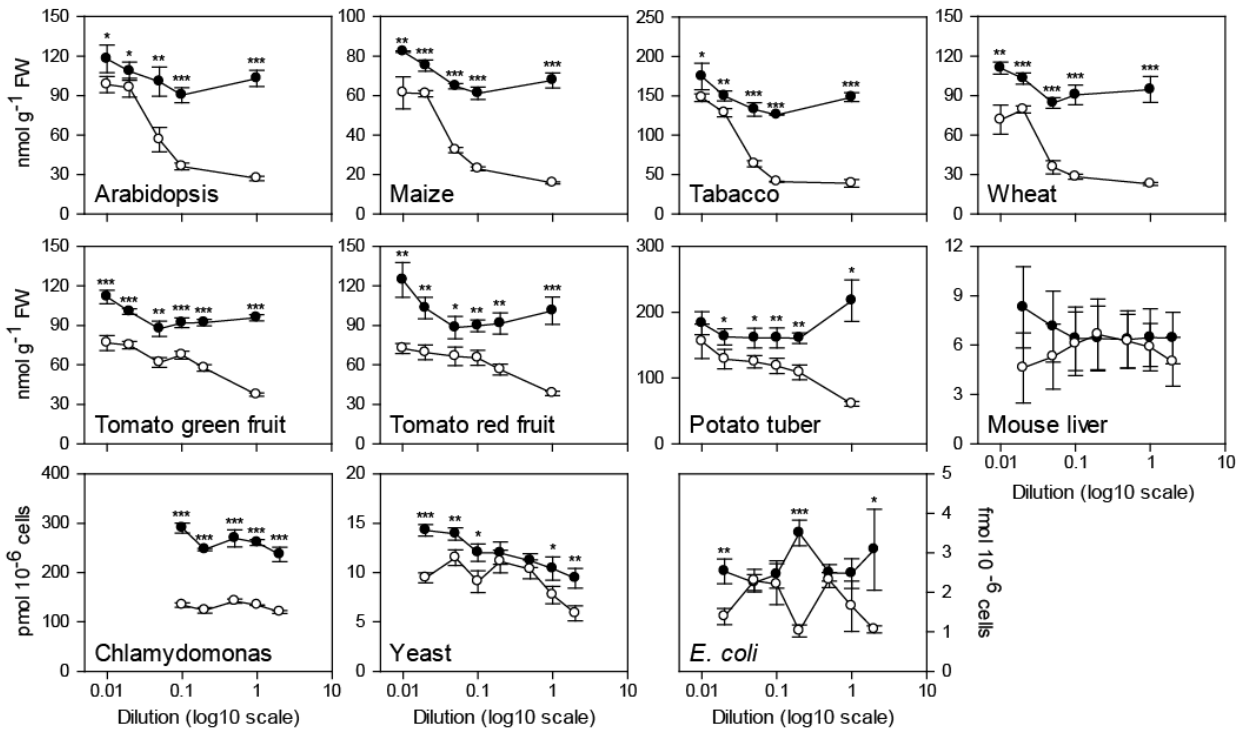**D-R5P**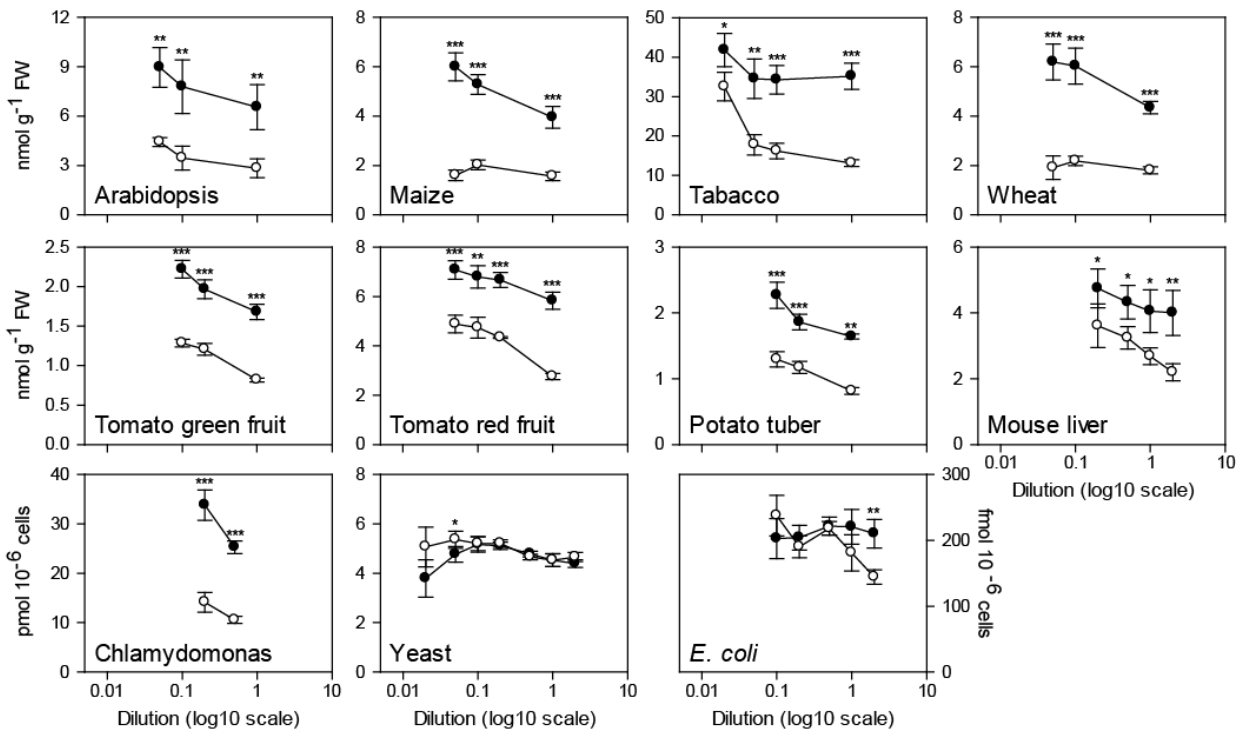

## E-Ru5P+Xu5P

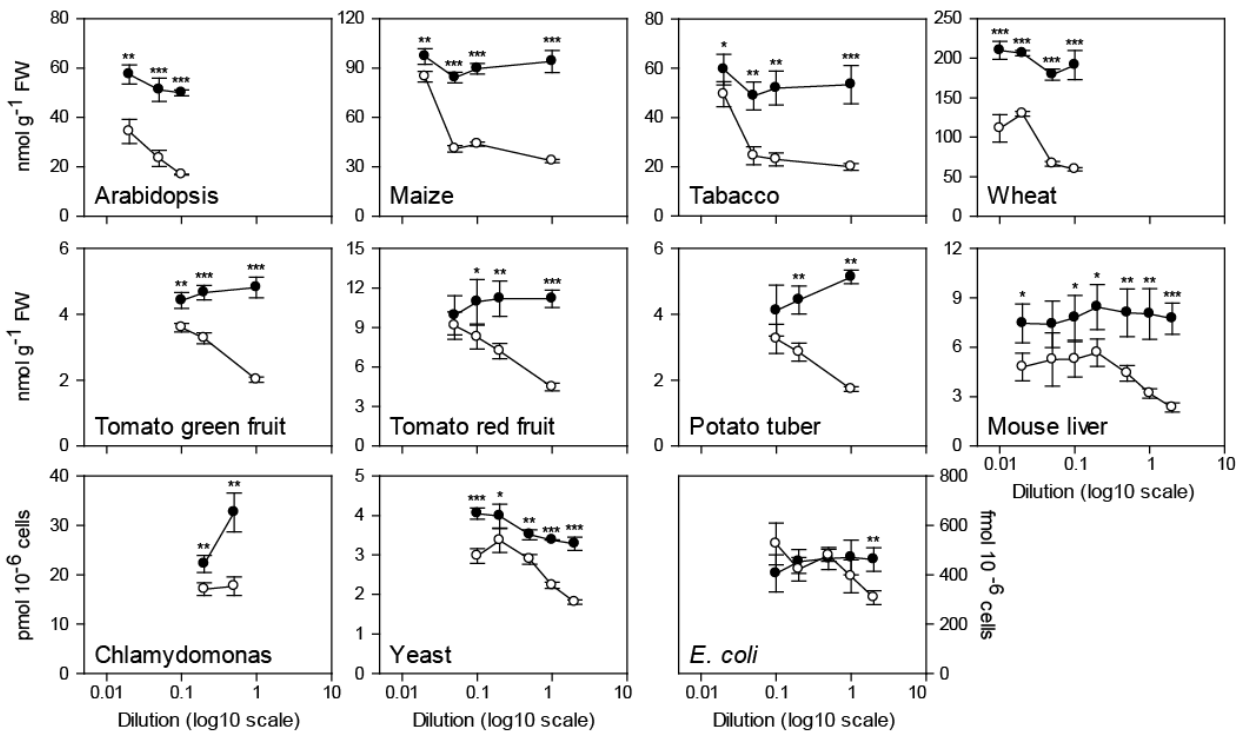

## F-DHAP

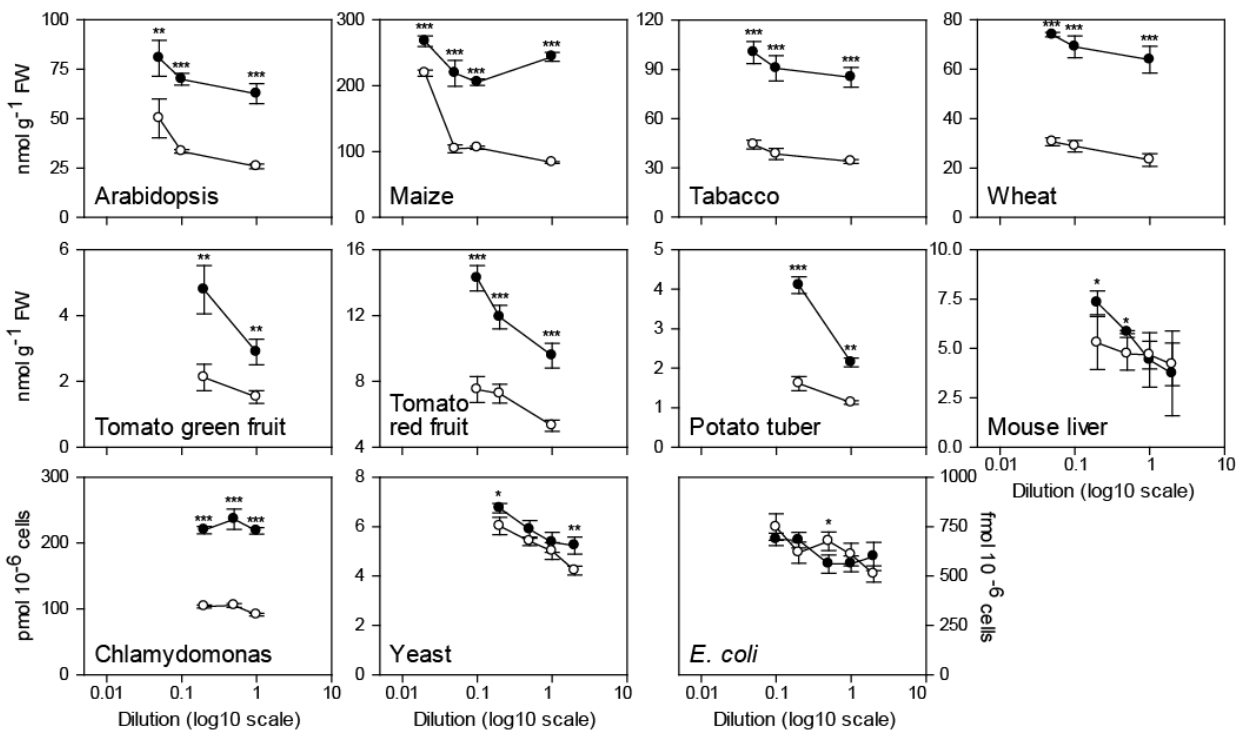

**G-AMP**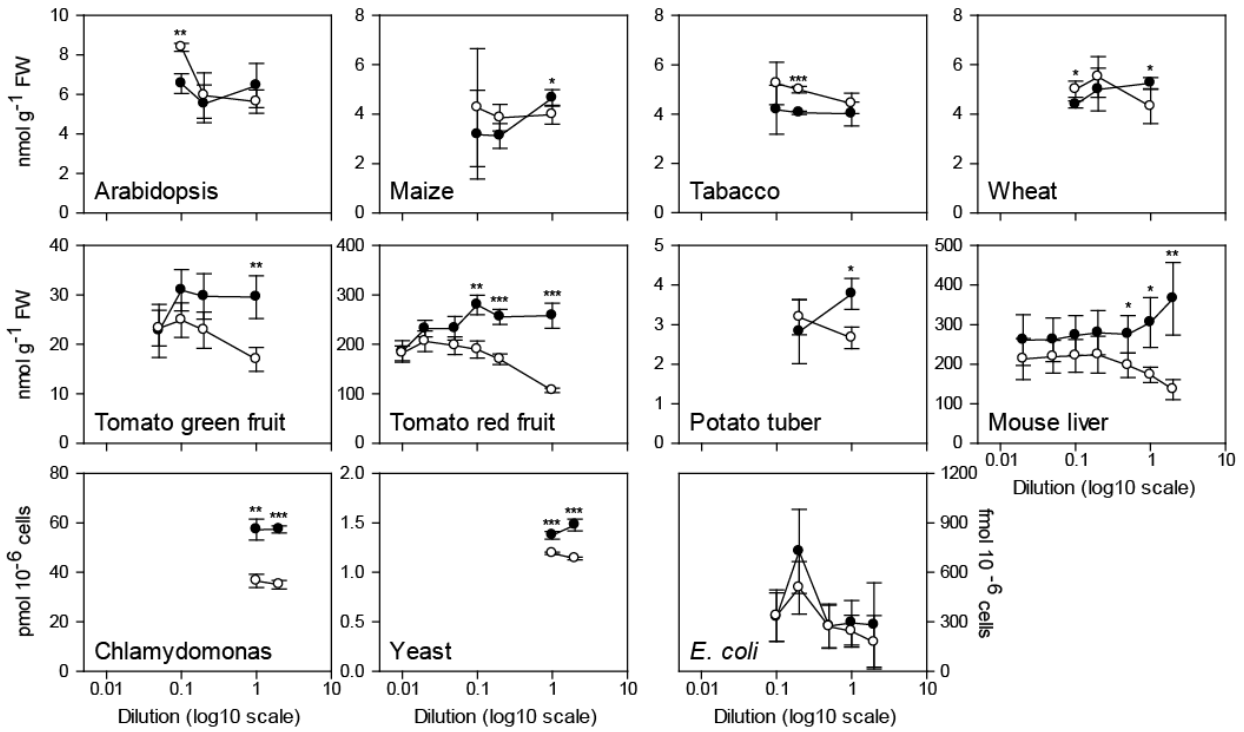**H-FBP**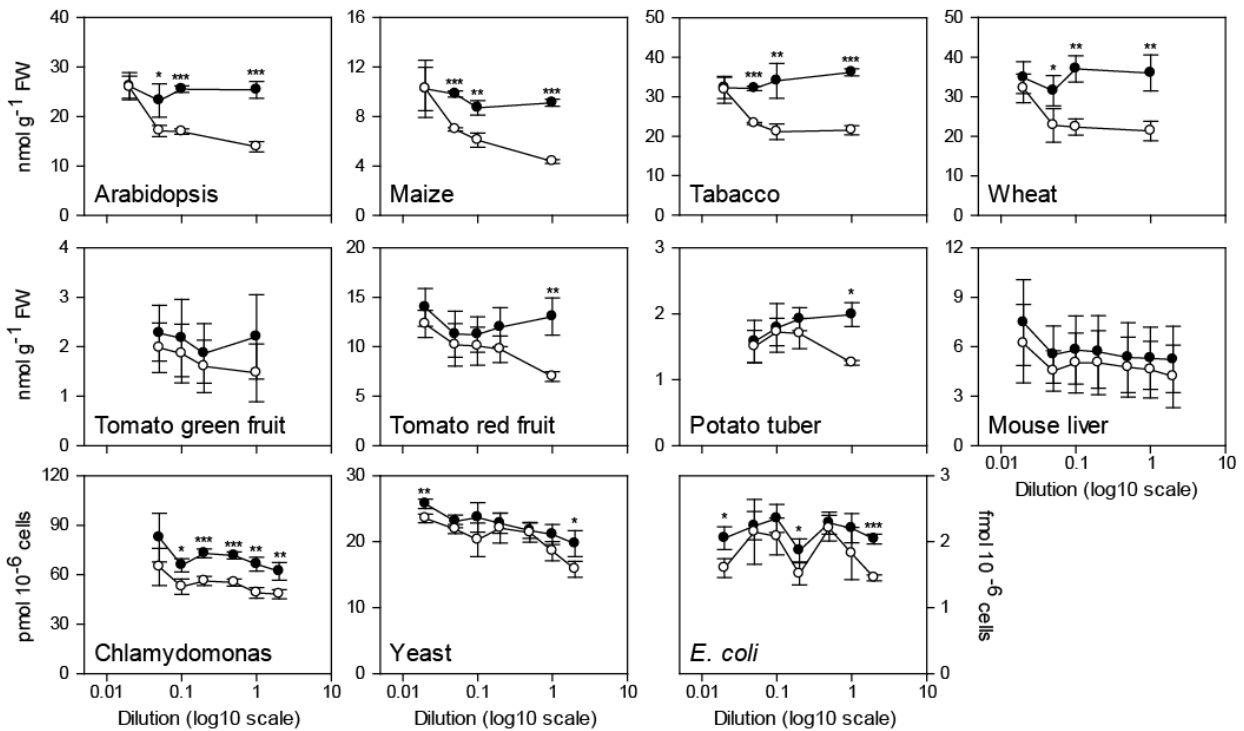

## I-2OG

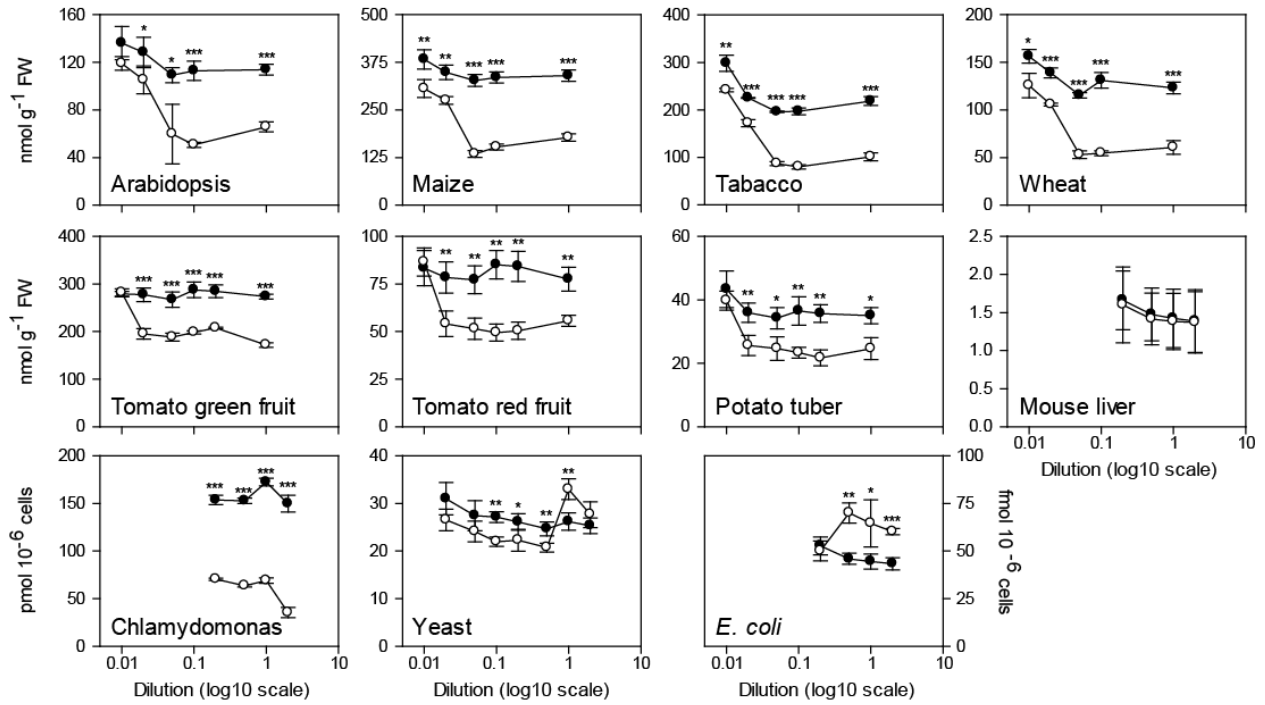

## J-Malate

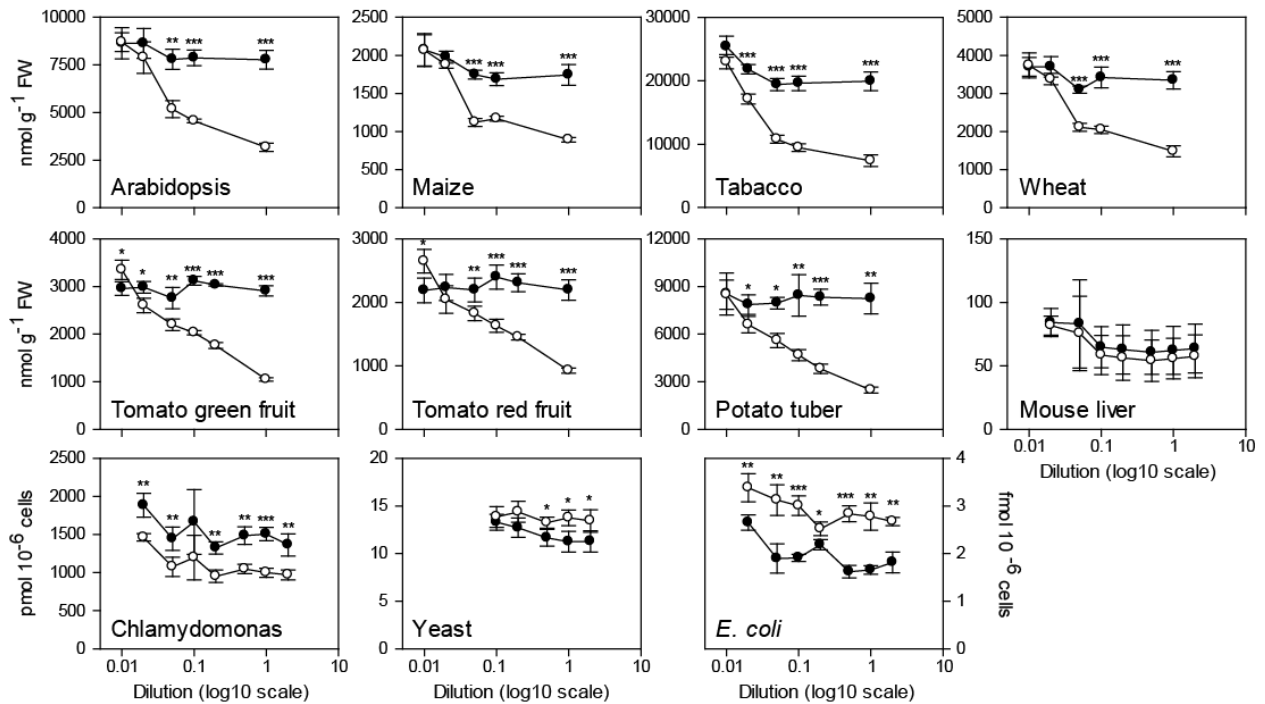



## K-Glycerate

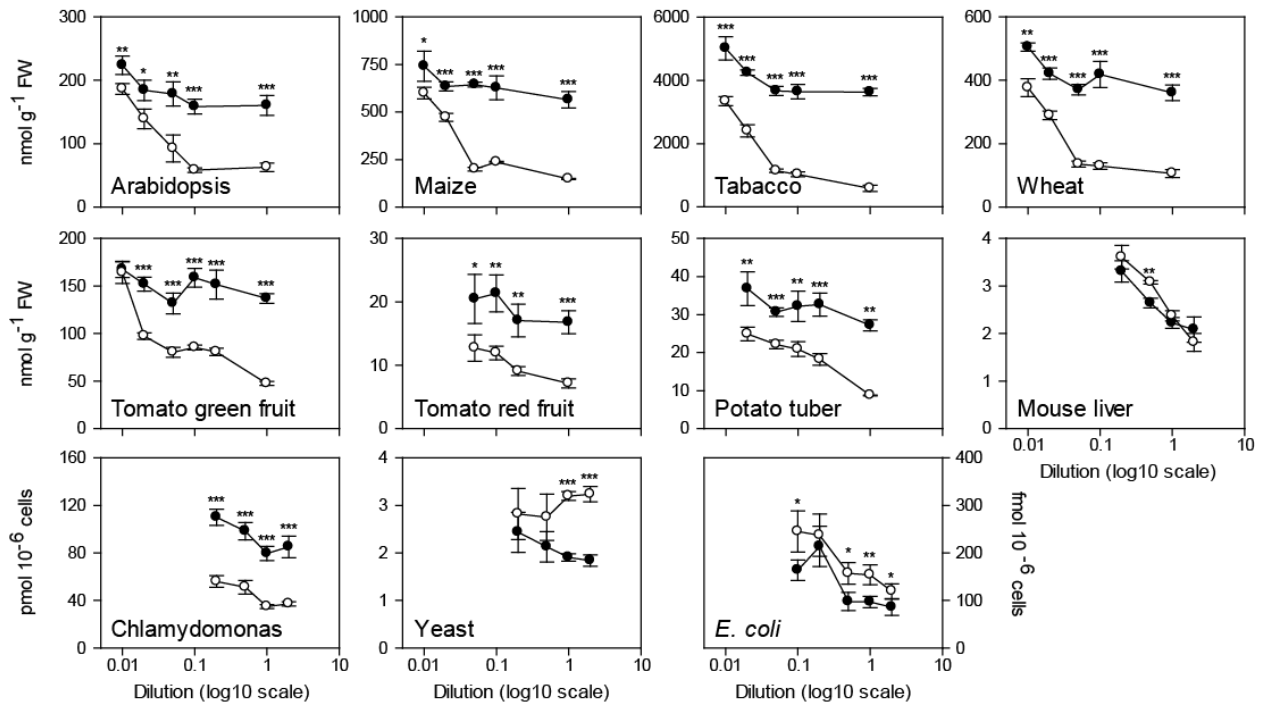

## L-Succinate

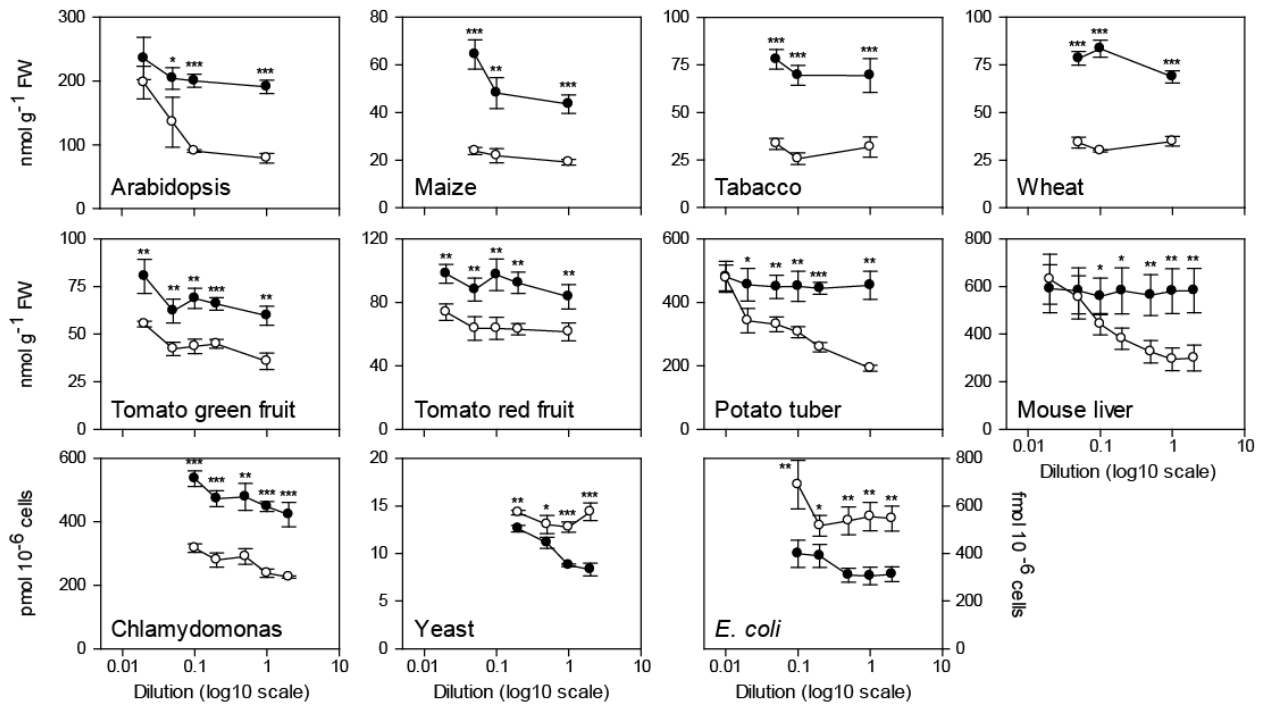

## M-Glutamate

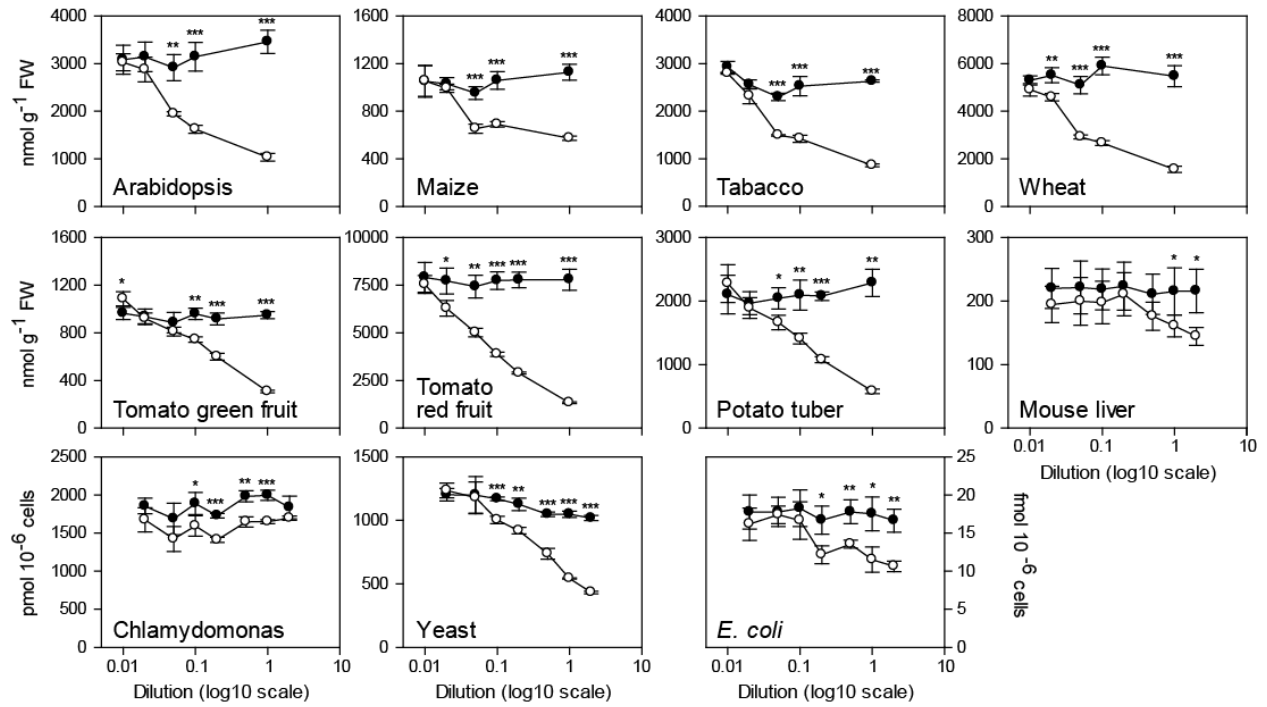

## N-Aspartate

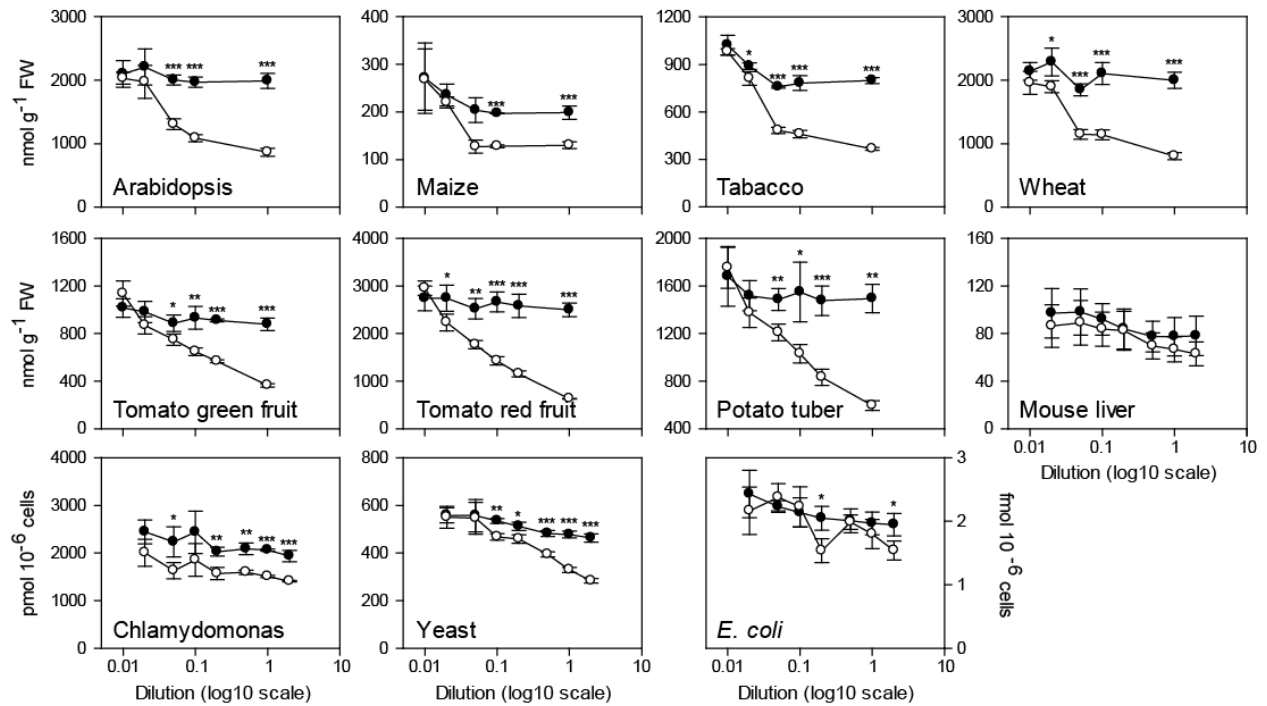

Supplement: Supplementary file 1 [file 3785899]
